# Supplementary material for: Beneficial bacterial-Auricularia cornea interactions fostering growth enhancement identified from microbiota present in spent mushroom substrate
Source: Front Microbiol. 2022 Oct 10;13:1006446. doi: 10.3389/fmicb.2022.1006446 (PMC9589457; doi:10.3389/fmicb.2022.1006446)
Supplement: Supplementary file 1 [file Table_1.xlsx]

## Sheet: Table S7
Table S7 Proteins in PPI networks
Network	Protein ID	Label	Domain	CAZy	MEROPS	MEROPS Family	TCDB	Cluster Type	Known Cluster	Busca
1	AC_1	hypothetical protein AURDEDRAFT_152649	PF12937 F-box-like							C:extracellular space
1	AC_2	DNA/RNA polymerase	PF17917 RNase H-like domain found in reverse transcriptase;PF00078 Reverse transcriptase (RNA-dependent DNA polymerase)		subfamily A28A unassigned peptidases (Pisolithus tinctorius)	A28				C:cytoplasm
1	AC_3	hypothetical protein AURDEDRAFT_131366	PF01400 Astacin (Peptidase family M12A);PF00078 Reverse transcriptase (RNA-dependent DNA polymerase)		subfamily M12A unassigned peptidases (Flavobacterium sp. CF136)	M12				C:cytoplasm
1	AC_4	hypothetical protein AURDEDRAFT_71766	PF07727 Reverse transcriptase (RNA-dependent DNA polymerase);PF13976 GAG-pre-integrase domain;PF00665 Integrase core domain		family A11 non-peptidase homologues (Phanerochaete chrysosporium)	A11				C:cytoplasm
1	AC_5	DNA/RNA polymerase	PF17917 RNase H-like domain found in reverse transcriptase;PF00078 Reverse transcriptase (RNA-dependent DNA polymerase)		subfamily A28A unassigned peptidases (Pisolithus tinctorius)	A28				C:cytoplasm
1	AC_6	hypothetical protein AURDEDRAFT_170623	PF12937 F-box-like							C:mitochondrion
1	AC_7	hypothetical protein AURDEDRAFT_163758	PF12937 F-box-like							C:nucleus
1	AC_8	hypothetical protein AURDEDRAFT_173997	PF12937 F-box-like							C:cytoplasm
1	AC_9	kinase-like protein	PF00069 Protein kinase domain							C:endomembrane system
1	AC_10	kinase-like protein	PF00069 Protein kinase domain							C:plasma membrane
1	AC_11	P-loop containing nucleoside triphosphate hydrolase protein	PF00004 ATPase family associated with various cellular activities (AAA)				3.A.16 The Endoplasmic Reticular Retrotranslocon (ER-RT) Family			C:cytoplasm
1	AC_12	Pkinase-domain-containing protein	PF00069 Protein kinase domain;PF05653 Magnesium transporter NIPA				8.A.104 The 5'-AMP-activated protein kinase (AMPK) Family			C:endomembrane system
1	AC_13	AAA-domain-containing protein, partial	PF00004 ATPase family associated with various cellular activities (AAA);PF17862 AAA+ lid domain		family M41 non-peptidase homologues (Glossina morsitans)	M41	1.R.1 The Membrane Contact Site (MCS) Family			C:cytoplasm
1	AC_14	beach-domain-containing protein	PF00400 WD domain;G-beta repeat;PF02138 Beige/BEACH domain							C:cytoplasm
1	AC_15	hypothetical protein AURDEDRAFT_124694	PF00075 RNase H;PF14529 Endonuclease-reverse transcriptase;PF00078 Reverse transcriptase (RNA-dependent DNA polymerase)		family T3 non-peptidase homologues (Talaromyces marneffei)	T03				C:cytoplasm
1	AC_16	phosphatases II	PF00782 Dual specificity phosphatase;catalytic domain							C:mitochondrion
1	AC_17	hypothetical protein AURDEDRAFT_123583	PF12937 F-box-like							C:cytoplasm
1	AC_18	hypothetical protein AURDEDRAFT_130644	PF12937 F-box-like							C:nucleus
1	AC_19	ATP-dependent DNA helicase	PF00270 DEAD/DEAH box helicase;PF00271 Helicase conserved C-terminal domain;PF07904 Chromatin modification-related protein EAF7				2.A.16 The Telurite-resistance/Dicarboxylate Transporter (TDT) Family			C:cytoplasm
1	AC_20	hypothetical protein AURDEDRAFT_115706	PF12783 Guanine nucleotide exchange factor in Golgi transport N-terminal;PF00400 WD domain;G-beta repeat;PF16213 Dimerisation and cyclophilin-binding domain of Mon2;PF16206 C-terminal region of Mon2 protein;PF09324 Domain of unknown function (DUF1981)		family S9 non-peptidase homologues (Ciona savignyi)	S09	1.I.1 The Nuclear Pore Complex (NPC) Family			C:plasma membrane
1	AC_21	pre-mRNA splicing factor	PF00270 DEAD/DEAH box helicase;PF04408 Helicase associated domain (HA2);PF07717 Oligonucleotide/oligosaccharide-binding (OB)-fold;PF00271 Helicase conserved C-terminal domain							C:endomembrane system
1	AC_22	hypothetical protein AURDEDRAFT_111977	PF14663 Rapamycin-insensitive companion of mTOR RasGEF_N domain;PF02185 Hr1 repeat;PF14664 Rapamycin-insensitive companion of mTOR;N-term;PF14666 Rapamycin-insensitive companion of mTOR;middle domain				8.A.188 The Rictor/mTORC2 (Rictor) Family			C:cytoplasm
1	AC_23	hypothetical protein AURDEDRAFT_160092	PF12937 F-box-like							C:mitochondrion
1	AC_24	hypothetical protein AURDEDRAFT_116227	PF12937 F-box-like							C:endomembrane system
1	AC_25	kinase-like protein	PF00069 Protein kinase domain							C:endomembrane system
1	AC_26	hypothetical protein AURDEDRAFT_174474	PF12937 F-box-like							C:cytoplasm
1	AC_27	Coatomer, beta' subunit	PF04053 Coatomer WD associated region;PF00400 WD domain;G-beta repeat		family S9 non-peptidase homologues (Dipodomys ordii)	S09	3.A.31 The Endosomal Sorting Complexes Required for Transport III (ESCRT-III) Family			C:cytoplasm
1	AC_28	DNA/RNA polymerase, partial	PF17917 RNase H-like domain found in reverse transcriptase;PF17921 Integrase zinc binding domain;PF00078 Reverse transcriptase (RNA-dependent DNA polymerase);PF03732 Retrotransposon gag protein;PF00665 Integrase core domain		family A2 unassigned peptidases (Oryza sativa)	A02				C:plasma membrane
1	AC_29	Pkinase-domain-containing protein	PF00069 Protein kinase domain;PF02149 Kinase associated domain 1				8.A.104 The 5'-AMP-activated protein kinase (AMPK) Family			C:extracellular space
1	AC_30	hypothetical protein AURDEDRAFT_188092	PF17917 RNase H-like domain found in reverse transcriptase;PF01494 FAD binding domain;PF00078 Reverse transcriptase (RNA-dependent DNA polymerase);PF00665 Integrase core domain		family A11 non-peptidase homologues (Oryza sativa)	A11				C:plasma membrane
1	AC_31	ATP-citrate synthase	PF00549 CoA-ligase;PF00285 Citrate synthase;C-terminal domain;PF00931 NB-ARC domain;PF16114 ATP citrate lyase citrate-binding;PF02629 CoA binding domain							C:plasma membrane
1	AC_32	hypothetical protein AURDEDRAFT_28818, partial	PF00098 Zinc knuckle;PF03732 Retrotransposon gag protein							C:cytoplasm
1	AC_33	hypothetical protein AURDEDRAFT_177485	PF00078 Reverse transcriptase (RNA-dependent DNA polymerase)		family T3 non-peptidase homologues (Talaromyces marneffei)	T03				C:endomembrane system
1	AC_34	P-loop containing nucleoside triphosphate hydrolase protein	PF00035 Double-stranded RNA binding motif;PF00270 DEAD/DEAH box helicase;PF04408 Helicase associated domain (HA2);PF00271 Helicase conserved C-terminal domain							C:plasma membrane
1	AC_35	thioredoxin-like protein, partial	PF00085 Thioredoxin							C:cytoplasm
1	AC_36	hypothetical protein AURDEDRAFT_113765	PF00622 SPRY domain							C:nucleus
1	AC_37	Pkinase-domain-containing protein, partial	PF00069 Protein kinase domain				1.C.104 The Heterokaryon Incompatibility Prion/Amyloid Protein (HET-s) Family			C:extracellular space
1	AC_38	AAA-domain-containing protein, partial	PF00004 ATPase family associated with various cellular activities (AAA);PF17862 AAA+ lid domain		subfamily S1A non-peptidase homologues (Solanum lycopersicum)	S01	3.A.20 The Peroxisomal Protein Importer (PPI) Family			C:cytoplasm
1	AC_39	Snf7-domain-containing protein	PF03357 Snf7				3.A.31 The Endosomal Sorting Complexes Required for Transport III (ESCRT-III) Family			C:cytoplasm
1	AC_40	hypothetical protein AURDEDRAFT_129115	PF00078 Reverse transcriptase (RNA-dependent DNA polymerase)							C:endomembrane system
1	AC_41	ribosomal protein S5 domain 2-like protein	PF01138 3' exoribonuclease family;domain 1							C:mitochondrion
1	AC_42	hypothetical protein AURDEDRAFT_67136, partial	PF00078 Reverse transcriptase (RNA-dependent DNA polymerase)							C:cytoplasm
1	AC_43	DNA/RNA polymerase, partial	PF17917 RNase H-like domain found in reverse transcriptase;PF17921 Integrase zinc binding domain;PF00078 Reverse transcriptase (RNA-dependent DNA polymerase);PF03732 Retrotransposon gag protein;PF00665 Integrase core domain		family A2 unassigned peptidases (Oryza sativa)	A02				C:endomembrane system
1	AC_44	hypothetical protein AURDEDRAFT_110629	PF00505 HMG (high mobility group) box;PF06212 GRIM-19 protein;PF09011 HMG-box domain;PF01920 Prefoldin subunit				3.D.1 The H+ or Na+-translocating NADH Dehydrogenase (NDH) Family			C:cytoplasm
1	AC_45	phosphatases II	PF00782 Dual specificity phosphatase;catalytic domain							C:cytoplasm
1	AC_46	hypothetical protein AURDEDRAFT_75169	PF00078 Reverse transcriptase (RNA-dependent DNA polymerase)							C:cytoplasm
1	AC_47	P-loop containing nucleoside triphosphate hydrolase protein	PF00271 Helicase conserved C-terminal domain							C:cytoplasm
1	AC_48	P-loop containing nucleoside triphosphate hydrolase protein	PF00004 ATPase family associated with various cellular activities (AAA)							C:endomembrane system
1	AC_49	hypothetical protein AURDEDRAFT_38674, partial	PF00078 Reverse transcriptase (RNA-dependent DNA polymerase);PF17109 fungal STAND N-terminal Goodbye domain							C:plasma membrane
1	AC_50	kinase-like protein	PF00069 Protein kinase domain				1.I.1 The Nuclear Pore Complex (NPC) Family			C:cytoplasm
1	AC_51	AAA-domain-containing protein, partial	PF00004 ATPase family associated with various cellular activities (AAA);PF17862 AAA+ lid domain				1.R.1 The Membrane Contact Site (MCS) Family			C:cytoplasm
1	AC_52	putative nitrilase	PF00004 ATPase family associated with various cellular activities (AAA);PF00795 Carbon-nitrogen hydrolase				1.R.1 The Membrane Contact Site (MCS) Family			C:extracellular space
1	AC_53	RNI-like protein	PF12937 F-box-like;PF13516 Leucine Rich repeat							C:nucleus
1	AC_54	ATP-dependent protease La	PF05362 Lon protease (S16) C-terminal proteolytic domain;PF02190 ATP-dependent protease La (LON) substrate-binding domain;PF00004 ATPase family associated with various cellular activities (AAA)	AA14	family S16 unassigned peptidases (Heterobasidion irregulare)	S16				C:extracellular space
1	AC_55	hypothetical protein AURDEDRAFT_75169	PF00078 Reverse transcriptase (RNA-dependent DNA polymerase)							C:plasma membrane
1	AC_56	WD40 repeat-like protein	PF00400 WD domain;G-beta repeat;PF07714 Protein tyrosine kinase		family S9 non-peptidase homologues (Thermobispora bispora)	S09	1.A.87 The Mechanosensitive Calcium Channel (MCA) Family			C:cytoplasm
1	AC_57	peroxysomal citrate synthase	PF00285 Citrate synthase;C-terminal domain							C:cytoplasm
1	AC_58	L domain-like protein, partial	PF00069 Protein kinase domain				8.A.104 The 5'-AMP-activated protein kinase (AMPK) Family			C:cytoplasm
1	AC_59	hypothetical protein AURDEDRAFT_129739	PF12937 F-box-like							C:mitochondrion
1	AC_60	hypothetical protein AURDEDRAFT_126502	PF12937 F-box-like							C:nucleus
1	AC_61	kinase-like protein	PF00069 Protein kinase domain;PF16093 Proteasome assembly chaperone 4					indole		C:plasma membrane
1	AC_62	ARM repeat-containing protein	PF00078 Reverse transcriptase (RNA-dependent DNA polymerase)							C:endomembrane system
1	AC_63	DNA/RNA polymerase	PF17917 RNase H-like domain found in reverse transcriptase;PF17921 Integrase zinc binding domain;PF17919 RNase H-like domain found in reverse transcriptase;PF00078 Reverse transcriptase (RNA-dependent DNA polymerase);PF03732 Retrotransposon gag protein;PF00665 Integrase core domain		family A2 unassigned peptidases (Oryza sativa)	A02				C:plasma membrane
1	AC_64	WD40 repeat-like protein	PF00400 WD domain;G-beta repeat;PF01156 Inosine-uridine preferring nucleoside hydrolase							C:plasma membrane
1	AC_65	hypothetical protein AURDEDRAFT_183424	PF00085 Thioredoxin;PF01388 ARID/BRIGHT DNA binding domain;PF08429 PLU-1-like protein;PF02375 jmjN domain;PF00628 PHD-finger;PF15456 Up-regulated During Septation;PF02373 JmjC domain;hydroxylase;PF02928 C5HC2 zinc finger							C:plasma membrane
1	AC_66	solute symporter family transporter	PF07727 Reverse transcriptase (RNA-dependent DNA polymerase);PF00474 Sodium:solute symporter family;PF13976 GAG-pre-integrase domain;PF00665 Integrase core domain		family A11 non-peptidase homologues (Phanerochaete chrysosporium)	A11	2.A.21 The Solute:Sodium Symporter (SSS) Family			C:plasma membrane
1	AC_67	ribonuclease H-like protein, partial	PF17921 Integrase zinc binding domain;PF17919 RNase H-like domain found in reverse transcriptase;PF00385 Chromo (CHRromatin Organisation MOdifier) domain;PF00665 Integrase core domain		family A2 unassigned peptidases (Meloidogyne incognita)	A02				C:cytoplasm
1	AC_68	ribonucleotide reductase alpha subunit	PF12937 F-box-like;PF02867 Ribonucleotide reductase;barrel domain;PF13446 A repeated domain in UCH-protein;PF00317 Ribonucleotide reductase;all-alpha domain							C:endomembrane system
1	AC_69	hypothetical protein AURDEDRAFT_71766	PF07727 Reverse transcriptase (RNA-dependent DNA polymerase);PF13976 GAG-pre-integrase domain;PF00665 Integrase core domain		family A11 non-peptidase homologues (Filobasidiella neoformans)	A11				C:endomembrane system
1	AC_70	alpha/beta-hydrolase	PF00326 Prolyl oligopeptidase family;PF07676 WD40-like Beta Propeller Repeat	CE10	subfamily S9C unassigned peptidases (Exidia glandulosa)	S09				C:cytoplasm
1	AC_71	FAD/NAD(P)-binding domain-containing protein	PF01494 FAD binding domain							C:organelle membrane
1	AC_72	hypothetical protein AURDEDRAFT_116126	PF00035 Double-stranded RNA binding motif							C:cytoplasm
1	AC_73	hypothetical protein AURDEDRAFT_76993, partial	PF14529 Endonuclease-reverse transcriptase;PF00078 Reverse transcriptase (RNA-dependent DNA polymerase)		family T3 non-peptidase homologues (Talaromyces marneffei)	T03				C:organelle membrane
1	AC_74	DNA/RNA polymerase	PF00078 Reverse transcriptase (RNA-dependent DNA polymerase)							C:extracellular space
1	AC_75	P-loop containing nucleoside triphosphate hydrolase protein	PF13087 AAA domain;PF17866 AAA lid domain;PF00579 tRNA synthetases class I (W and Y);PF13086 AAA domain;PF00004 ATPase family associated with various cellular activities (AAA)				3.A.24 The Type VII or ESX Protein Secretion System (T7SS) Family			C:plasma membrane
1	AC_76	hypothetical protein AURDEDRAFT_117534	PF02171 Piwi domain							C:extracellular space
1	AC_77	P-loop containing nucleoside triphosphate hydrolase protein	PF04408 Helicase associated domain (HA2);PF07717 Oligonucleotide/oligosaccharide-binding (OB)-fold;PF13401 AAA domain;PF00271 Helicase conserved C-terminal domain							C:plasma membrane
1	AC_78	hypothetical protein AURDEDRAFT_77757, partial	PF07727 Reverse transcriptase (RNA-dependent DNA polymerase);PF13976 GAG-pre-integrase domain;PF00665 Integrase core domain		family A11 non-peptidase homologues (Phanerochaete chrysosporium)	A11				C:endomembrane system
1	AC_79	Piwi-domain-containing protein	PF16486 N-terminal domain of argonaute;PF02171 Piwi domain;PF08699 Argonaute linker 1 domain;PF02170 PAZ domain;PF16488 Argonaute linker 2 domain							C:nucleus
1	AC_80	deuterolysin M35 metalloprotease	PF00400 WD domain;G-beta repeat;PF07714 Protein tyrosine kinase;PF14521 Lysine-specific metallo-endopeptidase		peptidyl-Lys metallopeptidase (Pleurotus ostreatus)	M35	8.A.23 The Basigin (Basigin) Family			C:endomembrane system
1	AC_81	WD40 repeat-like protein	PF00069 Protein kinase domain;PF00400 WD domain;G-beta repeat;PF07714 Protein tyrosine kinase		family S9 non-peptidase homologues (Thermobispora bispora)	S09				C:extracellular space
1	AC_82	Pkinase-domain-containing protein	PF00069 Protein kinase domain;PF00400 WD domain;G-beta repeat;PF08587 Ubiquitin associated domain (UBA);PF16579 Adenylate sensor of SNF1-like protein kinase;PF00097 Zinc finger;C3HC4 type (RING finger)		family A31 non-peptidase homologues (Thecamonas trahens)	A31	8.A.104 The 5'-AMP-activated protein kinase (AMPK) Family			C:extracellular space
1	AC_83	hypothetical protein AURDEDRAFT_187682	PF12937 F-box-like							C:extracellular space
1	AC_84	kinase-like protein	PF11160 Hypervirulence associated proteins TUDOR domain;PF00069 Protein kinase domain;PF00130 Phorbol esters/diacylglycerol binding domain (C1 domain)				1.A.87 The Mechanosensitive Calcium Channel (MCA) Family			C:cytoplasm
1	AC_85	eukaryotic type KH-domain (KH-domain type I)	PF00013 KH domain					NRPS-like		C:nucleus
1	AC_86	hypothetical protein AURDEDRAFT_110220	PF07304 Steroid receptor RNA activator (SRA1)		family S9 non-peptidase homologues (Ciona intestinalis)	S09	3.A.5 The General Secretory Pathway (Sec) Family			C:nucleus
1	AC_87	hypothetical protein AURDEDRAFT_63033, partial	PF17917 RNase H-like domain found in reverse transcriptase;PF17921 Integrase zinc binding domain;PF00078 Reverse transcriptase (RNA-dependent DNA polymerase)		subfamily A2A non-peptidase homologues (Echinococcus multilocularis)	A02				C:extracellular space
1	AC_88	hypothetical protein AURDEDRAFT_170229	PF00271 Helicase conserved C-terminal domain							C:cytoplasm
1	AC_89	hypothetical protein AURDEDRAFT_105919	PF16862 Glycosyl hydrolase family 79 C-terminal beta domain;PF00145 C-5 cytosine-specific DNA methylase;PF00176 SNF2 family N-terminal domain	GH79						C:endomembrane system
1	AC_90	DEAD-domain-containing protein	PF00270 DEAD/DEAH box helicase;PF00271 Helicase conserved C-terminal domain				1.I.1 The Nuclear Pore Complex (NPC) Family			C:cytoplasm
1	AC_91	citrate synthase-like protein	PF00285 Citrate synthase;C-terminal domain							C:mitochondrial membrane
1	AC_92	S-adenosyl-L-methionine-dependent methyltransferase	PF00145 C-5 cytosine-specific DNA methylase							C:endomembrane system
1	AC_93	hypothetical protein AURDEDRAFT_115590	PF00564 PB1 domain							C:cytoplasm
1	AC_94	hypothetical protein AURDEDRAFT_143555	PF12937 F-box-like;PF04479 RTA1 like protein							C:plasma membrane
1	AC_95	hypothetical protein AURDEDRAFT_121889	PF12937 F-box-like							C:cytoplasm
1	AC_96	hypothetical protein AURDEDRAFT_170322	PF12937 F-box-like							C:nucleus
1	AC_97	DNA/RNA polymerase	PF17921 Integrase zinc binding domain;PF17919 RNase H-like domain found in reverse transcriptase;PF00665 Integrase core domain		subfamily A28A unassigned peptidases (Hebeloma cylindrosporum)	A28				C:cytoplasm
1	AC_98	hypothetical protein AURDEDRAFT_130204	PF00078 Reverse transcriptase (RNA-dependent DNA polymerase)							C:endomembrane system
1	AC_99	hypothetical protein AURDEDRAFT_113199	PF13832 PHD-zinc-finger like domain;PF00628 PHD-finger;PF01302 CAP-Gly domain;PF14560 Ubiquitin-like domain;PF01426 BAH domain							C:nucleus
1	AC_100	hypothetical protein AURDEDRAFT_111172	PF00069 Protein kinase domain;PF00071 Ras family;PF00628 PHD-finger				8.A.92 The G-Protein ??? Complex (GPC) Family			C:plasma membrane
1	AC_101	hypothetical protein AURDEDRAFT_71766	PF07727 Reverse transcriptase (RNA-dependent DNA polymerase);PF00665 Integrase core domain		family A11 non-peptidase homologues (Phanerochaete chrysosporium)	A11				C:mitochondrion
1	AC_102	glycosyl hydrolase	PF00400 WD domain;G-beta repeat;PF07714 Protein tyrosine kinase;PF07470 Glycosyl Hydrolase Family 88;PF17784 Sulfotransferase domain	GH105						C:cytoplasm
1	AC_103	hypothetical protein AURDEDRAFT_63080, partial	PF07727 Reverse transcriptase (RNA-dependent DNA polymerase);PF17919 RNase H-like domain found in reverse transcriptase;PF13976 GAG-pre-integrase domain;PF00665 Integrase core domain		family A11 non-peptidase homologues (Phanerochaete chrysosporium)	A11				C:cytoplasm
1	AC_104	Mov34-domain-containing protein	PF01398 JAB1/Mov34/MPN/PAD-1 ubiquitin protease;PF12998 Inhibitor of growth proteins N-terminal histone-binding;PF08969 USP8 dimerisation domain		subfamily M67C unassigned peptidases (Serpula lacrymans)	M67				C:extracellular space
1	AC_105	nuclear mRNA splicing protein	PF00400 WD domain;G-beta repeat		family S9 non-peptidase homologues (Dipodomys ordii)	S09				C:mitochondrion
1	AC_106	hypothetical protein AURDEDRAFT_33739, partial	PF05970 PIF1-like helicase;PF00078 Reverse transcriptase (RNA-dependent DNA polymerase)							C:endomembrane system
1	AC_107	hypothetical protein AURDEDRAFT_150673	PF00069 Protein kinase domain;PF08311 Mad3/BUB1 homology region 1							C:cytoplasm
1	AC_108	hypothetical protein AURDEDRAFT_65764	PF00326 Prolyl oligopeptidase family;PF02463 RecF/RecN/SMC N terminal domain;PF06470 SMC proteins Flexible Hinge Domain;PF02897 Prolyl oligopeptidase;N-terminal beta-propeller domain		subfamily S9A unassigned peptidases (Auricularia subglabra)	S09				C:mitochondrion
1	PM_1	Ribonuclease D	PF18305 3' to 5' exonuclease C-terminal domain;PF01612 3'-5' exonuclease;PF00570 HRDC domain							C:cytoplasm
1	PM_2	Enoyl-CoA hydratase	PF00378 Enoyl-CoA hydratase/isomerase							C:cytoplasm
1	PM_3	Uncharacterized protein	PF00271 Helicase conserved C-terminal domain;PF00176 SNF2 family N-terminal domain							C:plasma membrane
1	PM_4	Cytosine-specific methyltransferase	PF00145 C-5 cytosine-specific DNA methylase							C:cytoplasm
1	PM_5	Integrase catalytic region	PF00665 Integrase core domain							C:cytoplasm
1	PM_6	2,4-dichlorophenol 6-monooxygenase	PF01494 FAD binding domain							C:cytoplasm
1	PM_7	TlpA family protein disulfide reductase	PF00578 AhpC/TSA family							C:extracellular space
1	PM_8	succinate--CoA ligase subunit alpha	PF00549 CoA-ligase;PF02629 CoA binding domain							C:cytoplasm
1	PM_9	MULTISPECIES: ATP-dependent Clp protease ATP-binding subunit	PF17871 AAA lid domain;PF07724 AAA domain (Cdc48 subfamily);PF02861 Clp amino terminal domain;pathogenicity island component;PF00004 ATPase family associated with various cellular activities (AAA);PF10431 C-terminal;D2-small domain;of ClpB protein	GH6			3.A.9 The Chloroplast Envelope Protein Translocase (CEPT or Tic-Toc) Family			C:cytoplasm
1	PM_10	enoyl-CoA hydratase-related protein	PF00378 Enoyl-CoA hydratase/isomerase		subfamily S49C non-peptidase homologues (Geomicrobium sp. JCM 19039)	S49				C:cytoplasm
1	PM_11	PDZ domain-containing protein	PF14684 Tricorn protease C1 domain;PF14685 Tricorn protease PDZ domain;PF07676 WD40-like Beta Propeller Repeat;PF03572 Peptidase family S41		tricorn core peptidase (bacteria) (Streptomyces clavuligerus)	S41				C:cytoplasm
1	PM_12	ATP-dependent DNA helicase RecG	PF00270 DEAD/DEAH box helicase;PF17191 RecG wedge domain;PF00271 Helicase conserved C-terminal domain				3.A.11 The Bacterial Competence-related DNA Transformation Transporter (DNA-T) Family			C:cytoplasm
1	PM_13	class IV lanthionine synthetase LanL	PF00326 Prolyl oligopeptidase family;PF00069 Protein kinase domain;PF05147 Lanthionine synthetase C-like protein		subfamily S9C unassigned peptidases (Saccharopolyspora erythraea)	S09		lanthipeptide-class-iv		C:plasma membrane
1	PM_14	FAD-dependent monooxygenase	PF01494 FAD binding domain							C:cytoplasm
1	PM_15	ATP-dependent chaperone ClpB	PF17871 AAA lid domain;PF07724 AAA domain (Cdc48 subfamily);PF02861 Clp amino terminal domain;pathogenicity island component;PF10431 C-terminal;D2-small domain;of ClpB protein;PF00004 ATPase family associated with various cellular activities (AAA)	GH6			3.A.9 The Chloroplast Envelope Protein Translocase (CEPT or Tic-Toc) Family			C:cytoplasm
1	PM_16	dipeptidyl-peptidase-4	PF00326 Prolyl oligopeptidase family;PF00930 Dipeptidyl peptidase IV (DPP IV) N-terminal region		subfamily S9B unassigned peptidases (Pseudonocardia sp. P1)	S09	8.A.51 The Dipeptidyl-aminopeptidase-like Protein 6 beta subunit of Kv4 channels (DPP6) Family			C:cytoplasm
1	PM_17	ATP-dependent RNA helicase	PF00270 DEAD/DEAH box helicase;PF08148 DSHCT (NUC185) domain							C:cytoplasm
1	PM_18	CN hydrolase domain-containing protein	PF00795 Carbon-nitrogen hydrolase							C:cytoplasm
1	PM_19	Transcription-repair-coupling factor	PF00270 DEAD/DEAH box helicase;PF02559 CarD-like/TRCF domain;PF17757 UvrB interaction domain;PF03461 TRCF domain;PF00271 Helicase conserved C-terminal domain				3.A.11 The Bacterial Competence-related DNA Transformation Transporter (DNA-T) Family			C:cytoplasm
1	PM_20	Cation acetate symporter	PF00474 Sodium:solute symporter family				2.A.21 The Solute:Sodium Symporter (SSS) Family			C:plasma membrane
1	PM_21	Crp/Fnr family transcriptional regulator	PF13545 Crp-like helix-turn-helix domain;PF00027 Cyclic nucleotide-binding domain							C:cytoplasm
1	PM_22	Uncharacterized protein	PF02558 Ketopantoate reductase PanE/ApbA;PF08546 Ketopantoate reductase PanE/ApbA C terminal;PF00581 Rhodanese-like domain							C:cytoplasm
1	PM_23	Monooxygenase	PF01494 FAD binding domain							C:plasma membrane
1	PM_24	Non-specific serine/threonine protein kinase	PF00069 Protein kinase domain				1.I.1 The Nuclear Pore Complex (NPC) Family			C:cytoplasm
1	PM_25	ATPase AAA	PF17871 AAA lid domain;PF07724 AAA domain (Cdc48 subfamily);PF00004 ATPase family associated with various cellular activities (AAA);PF10431 C-terminal;D2-small domain;of ClpB protein				3.A.9 The Chloroplast Envelope Protein Translocase (CEPT or Tic-Toc) Family			C:cytoplasm
1	PM_26	DEAD/DEAH box helicase	PF09369 Domain of unknown function (DUF1998);PF00270 DEAD/DEAH box helicase;PF00271 Helicase conserved C-terminal domain							C:cytoplasm
1	PM_27	Lon protease	PF05362 Lon protease (S16) C-terminal proteolytic domain;PF02190 ATP-dependent protease La (LON) substrate-binding domain;PF00004 ATPase family associated with various cellular activities (AAA)		family S16 unassigned peptidases (Pseudonocardia dioxanivorans)	S16				C:cytoplasm
1	PM_28	Transcriptional regulator, Crp/Fnr family	PF13545 Crp-like helix-turn-helix domain;PF00027 Cyclic nucleotide-binding domain							C:cytoplasm
1	PM_29	Integrase catalytic region	PF00665 Integrase core domain							C:cytoplasm
1	PM_30	Putative PAS/PAC sensor protein	PF13185 GAF domain;PF13581 Histidine kinase-like ATPase domain;PF00072 Response regulator receiver domain;PF01590 GAF domain;PF13426 PAS domain;PF08447 PAS fold;PF07228 Stage II sporulation protein E (SpoIIE);PF13466 STAS domain							C:cytoplasm
1	PM_31	Sulfurtransferase	PF00581 Rhodanese-like domain							C:cytoplasm
1	PM_32	Transcription-repair-coupling factor	PF00270 DEAD/DEAH box helicase;PF02559 CarD-like/TRCF domain;PF17757 UvrB interaction domain;PF03461 TRCF domain;PF00271 Helicase conserved C-terminal domain				3.A.11 The Bacterial Competence-related DNA Transformation Transporter (DNA-T) Family			C:cytoplasm
1	PM_33	FAD dependent oxidoreductase	PF01494 FAD binding domain							C:cytoplasm
1	PM_34	AAA ATPase central domain protein	PF00004 ATPase family associated with various cellular activities (AAA);PF01434 Peptidase family M41		family M41 unassigned peptidases (Pseudonocardia dioxanivorans)	M41	3.A.29 The Mitochondrial Inner Membrane i-AAA Protease Complex (MIMP) Family			C:plasma membrane
1	PM_35	WD40 repeat-containing protein	PF00400 WD domain;G-beta repeat		family S9 non-peptidase homologues (Gordonia bronchialis)	S09				C:cytoplasm
1	PM_36	Guanylate kinase	PF00625 Guanylate kinase							C:cytoplasm
1	PM_37	MULTISPECIES: transcriptional regulator NrdR	PF03477 ATP cone domain							C:cytoplasm
1	PM_38	ATP-dependent helicase	PF00270 DEAD/DEAH box helicase;PF08494 DEAD/H associated;PF00271 Helicase conserved C-terminal domain							C:cytoplasm
1	PM_39	enoyl-CoA hydratase/isomerase family protein	PF00378 Enoyl-CoA hydratase/isomerase							C:cytoplasm
1	PM_40	citrate synthase	PF00285 Citrate synthase;C-terminal domain							C:plasma membrane
1	PM_41	MULTISPECIES: enoyl-CoA hydratase-related protein	PF00378 Enoyl-CoA hydratase/isomerase		subfamily S49C non-peptidase homologues (Bacillus simplex)	S49				C:cytoplasm
1	PM_42	MULTISPECIES: Crp/Fnr family transcriptional regulator	PF13545 Crp-like helix-turn-helix domain;PF00027 Cyclic nucleotide-binding domain							C:cytoplasm
1	PM_43	enoyl-CoA hydratase-related protein	PF00378 Enoyl-CoA hydratase/isomerase		subfamily S49C non-peptidase homologues (Geomicrobium sp. JCM 19055)	S49				C:cytoplasm
1	PM_44	DDE-type integrase/transposase/recombinase, partial	PF00665 Integrase core domain							C:cytoplasm
1	PM_45	RNA-binding transcriptional accessory protein	PF12836 Helix-hairpin-helix motif;PF00575 S1 RNA binding domain;PF09371 Tex-like protein N-terminal domain;PF16921 Tex protein YqgF-like domain;PF17674 HHH domain							C:cytoplasm
1	PM_46	IS3 family transposase	PF13276 HTH-like domain;PF00665 Integrase core domain							C:cytoplasm
1	PM_47	serine/threonine protein kinase	PF00069 Protein kinase domain				1.A.87 The Mechanosensitive Calcium Channel (MCA) Family			C:cytoplasm
1	PM_48	enoyl-CoA hydratase-related protein	PF00378 Enoyl-CoA hydratase/isomerase							C:cytoplasm
1	PM_49	DUF3516 domain-containing protein	PF00270 DEAD/DEAH box helicase;PF00271 Helicase conserved C-terminal domain;PF12029 Domain of unknown function (DUF3516)							C:cytoplasm
1	PM_50	enoyl-CoA hydratase/isomerase family protein	PF00378 Enoyl-CoA hydratase/isomerase		subfamily S49C non-peptidase homologues (Geomicrobium sp. JCM 19055)	S49		betalactone		C:cytoplasm
1	PM_51	serine/threonine protein kinase	PF00069 Protein kinase domain				1.I.1 The Nuclear Pore Complex (NPC) Family			C:cytoplasm
1	PM_52	FAD-dependent monooxygenase	PF01494 FAD binding domain							C:plasma membrane
1	PM_53	protein FdrA	PF00549 CoA-ligase							C:cytoplasm
1	PM_54	FAD-dependent monooxygenase	PF01494 FAD binding domain							C:plasma membrane
1	PM_55	Crp/Fnr family transcriptional regulator	PF13545 Crp-like helix-turn-helix domain;PF00027 Cyclic nucleotide-binding domain							C:cytoplasm
1	PM_56	enoyl-CoA hydratase-related protein	PF00378 Enoyl-CoA hydratase/isomerase		subfamily S49C non-peptidase homologues (Acinetobacter bohemicus)	S49				C:cytoplasm
1	PM_57	ATP-dependent RNA helicase HrpA	PF04408 Helicase associated domain (HA2);PF07717 Oligonucleotide/oligosaccharide-binding (OB)-fold;PF00271 Helicase conserved C-terminal domain;PF11898 Domain of unknown function (DUF3418)							C:cytoplasm
1	PM_58	endopeptidase La	PF05362 Lon protease (S16) C-terminal proteolytic domain;PF02190 ATP-dependent protease La (LON) substrate-binding domain;PF00004 ATPase family associated with various cellular activities (AAA)		family S16 unassigned peptidases (Pseudonocardia dioxanivorans)	S16				C:cytoplasm
1	PM_59	FAD-dependent monooxygenase	PF01494 FAD binding domain							C:plasma membrane
2	AC_109	putative short-chain dehydrogenases/reductase	PF00106 short chain dehydrogenase							C:mitochondrion
2	AC_110	NAD-dependent aldehyde dehydrogenase	PF00171 Aldehyde dehydrogenase family							C:organelle membrane
2	AC_111	alpha-aminoadipate reductase Lys1p	PF00550 Phosphopantetheine attachment site;PF08264 Anticodon-binding domain of tRNA;PF00328 Histidine phosphatase superfamily (branch 2);PF07993 Male sterility protein;PF00133 tRNA synthetases class I (I;L;M and V);PF00501 AMP-binding enzyme					NRPS-like		C:plasma membrane
2	AC_112	PEBP-like protein	PF00106 short chain dehydrogenase;PF01161 Phosphatidylethanolamine-binding protein		family I51 unassigned peptidase inhibitors (Serpula lacrymans)	I51				C:organelle membrane
2	AC_113	NAD(P)-binding protein	PF00107 Zinc-binding dehydrogenase;PF07896 Protein of unknown function (DUF1674);PF16884 N-terminal domain of oxidoreductase							C:endomembrane system
2	AC_114	GroES-like protein	PF00107 Zinc-binding dehydrogenase;PF08240 Alcohol dehydrogenase GroES-like domain							C:plasma membrane
2	AC_115	NAD(P)-binding protein	PF00106 short chain dehydrogenase				1.A.115 The Pore-forming NADPH-dependent 1-Acyldihydroxyacetone Phosphate Reductase (Ayr1) Family			C:organelle membrane
2	AC_116	NAD(P)-binding protein	PF00106 short chain dehydrogenase							C:plasma membrane
2	AC_117	fatty acid synthase	PF00698 Acyl transferase domain;PF08354 Domain of unknown function (DUF1729);PF02801 Beta-ketoacyl synthase;C-terminal domain;PF18325 Fatty acid synthase subunit alpha Acyl carrier domain;PF18314 Fatty acid synthase type I helical domain;PF13561 Enoyl-(Acyl carrier protein) reductase;PF16073 Starter unit:ACP transacylase in aflatoxin biosynthesis;PF01648 4'-phosphopantetheinyl transferase superfa…							C:cytoplasm
2	PM_60	4-chlorobenzoate--CoA ligase	PF13193 AMP-binding enzyme C-terminal domain;PF00501 AMP-binding enzyme				4.C.1 The Fatty Acid Group Translocation (FAT) Family			C:plasma membrane
2	PM_61	NADP-dependent oxidoreductase	PF00107 Zinc-binding dehydrogenase;PF16884 N-terminal domain of oxidoreductase							C:plasma membrane
2	PM_62	Acetaldehyde dehydrogenase (Acetylating)	PF00171 Aldehyde dehydrogenase family							C:cytoplasm
2	PM_63	Long-chain-fatty-acid--CoA ligase	PF13193 AMP-binding enzyme C-terminal domain;PF00501 AMP-binding enzyme				4.C.1 The Fatty Acid Group Translocation (FAT) Family			C:plasma membrane
2	PM_64	O-succinylbenzoate--CoA ligase	PF13193 AMP-binding enzyme C-terminal domain;PF00501 AMP-binding enzyme				4.C.1 The Fatty Acid Group Translocation (FAT) Family			C:plasma membrane
2	PM_65	Long-chain-fatty-acid--CoA ligase	PF13193 AMP-binding enzyme C-terminal domain;PF00501 AMP-binding enzyme				4.C.1 The Fatty Acid Group Translocation (FAT) Family			C:plasma membrane
2	PM_66	AMP-binding protein	PF13193 AMP-binding enzyme C-terminal domain;PF00501 AMP-binding enzyme				4.C.1 The Fatty Acid Group Translocation (FAT) Family			C:plasma membrane
2	PM_67	NADP-dependent oxidoreductase	PF13602 Zinc-binding dehydrogenase;PF08240 Alcohol dehydrogenase GroES-like domain							C:plasma membrane
2	PM_68	aldehyde dehydrogenase family protein	PF00171 Aldehyde dehydrogenase family							C:cytoplasm
2	PM_69	crotonyl-CoA carboxylase/reductase	PF00107 Zinc-binding dehydrogenase;PF08240 Alcohol dehydrogenase GroES-like domain							C:plasma membrane
2	PM_70	AMP-binding protein	PF13193 AMP-binding enzyme C-terminal domain;PF00501 AMP-binding enzyme				4.C.1 The Fatty Acid Group Translocation (FAT) Family	betalactone	yatakemycin	C:plasma membrane
2	PM_71	NADP-dependent oxidoreductase	PF13602 Zinc-binding dehydrogenase;PF08240 Alcohol dehydrogenase GroES-like domain							C:plasma membrane
2	PM_72	SDR family NAD(P)-dependent oxidoreductase	PF00106 short chain dehydrogenase							C:cytoplasm
2	PM_73	AMP-binding protein	PF00501 AMP-binding enzyme				4.C.1 The Fatty Acid Group Translocation (FAT) Family			C:plasma membrane
2	PM_74	SDR family oxidoreductase	PF00106 short chain dehydrogenase							C:cytoplasm
2	PM_75	Acyl transferase domain-containing protein	PF00550 Phosphopantetheine attachment site;PF00698 Acyl transferase domain;PF08659 KR domain;PF16197 Ketoacyl-synthetase C-terminal extension;PF02801 Beta-ketoacyl synthase;C-terminal domain;PF13193 AMP-binding enzyme C-terminal domain;PF14765 Polyketide synthase dehydratase;PF00501 AMP-binding enzyme;PF00109 Beta-ketoacyl synthase;N-terminal domain	GT2			4.C.1 The Fatty Acid Group Translocation (FAT) Family			C:plasma membrane
2	PM_76	Dehydrogenase	PF00107 Zinc-binding dehydrogenase;PF08240 Alcohol dehydrogenase GroES-like domain							C:plasma membrane
2	PM_77	Betaine-aldehyde dehydrogenase	PF00171 Aldehyde dehydrogenase family							C:cytoplasm
2	PM_78	Putative short chain dehydrogenase/reductase	PF00106 short chain dehydrogenase							C:cytoplasm
2	PM_79	ATP-dependent acyl-CoA ligase	PF13193 AMP-binding enzyme C-terminal domain;PF00501 AMP-binding enzyme				4.C.1 The Fatty Acid Group Translocation (FAT) Family			C:plasma membrane
2	PM_80	Aldehyde dehydrogenase	PF00171 Aldehyde dehydrogenase family							C:cytoplasm
2	PM_81	Protochlorophyllide reductase	PF00106 short chain dehydrogenase							C:cytoplasm
2	PM_82	Amino acid adenylation domain protein	PF00550 Phosphopantetheine attachment site;PF00668 Condensation domain;PF00975 Thioesterase domain;PF13193 AMP-binding enzyme C-terminal domain;PF00501 AMP-binding enzyme	GH4			4.C.1 The Fatty Acid Group Translocation (FAT) Family			C:plasma membrane
2	PM_83	Long-chain-fatty-acid--CoA ligase	PF13193 AMP-binding enzyme C-terminal domain;PF00501 AMP-binding enzyme				4.C.1 The Fatty Acid Group Translocation (FAT) Family			C:plasma membrane
2	PM_84	3-hydroxyacyl-CoA dehydrogenase	PF00106 short chain dehydrogenase							C:cytoplasm
2	PM_85	SDR family oxidoreductase	PF00106 short chain dehydrogenase				1.A.115 The Pore-forming NADPH-dependent 1-Acyldihydroxyacetone Phosphate Reductase (Ayr1) Family			C:cytoplasm
2	PM_86	non-ribosomal peptide synthetase	PF00550 Phosphopantetheine attachment site;PF00668 Condensation domain;PF13193 AMP-binding enzyme C-terminal domain;PF00501 AMP-binding enzyme	GT2			4.C.1 The Fatty Acid Group Translocation (FAT) Family	NRPS	gobichelin A / gobichelin B	C:plasma membrane
2	PM_87	phenylacetic acid degradation bifunctional protein PaaZ	PF00171 Aldehyde dehydrogenase family;PF01575 MaoC like domain							C:plasma membrane
2	PM_88	amino acid adenylation domain-containing protein	PF00550 Phosphopantetheine attachment site;PF13193 AMP-binding enzyme C-terminal domain;PF00501 AMP-binding enzyme					NAPAA	tomaymycin	C:plasma membrane
2	PM_89	SDR family NAD(P)-dependent oxidoreductase	PF00106 short chain dehydrogenase							C:plasma membrane
2	PM_90	AMP-binding protein	PF13193 AMP-binding enzyme C-terminal domain;PF00501 AMP-binding enzyme				4.C.1 The Fatty Acid Group Translocation (FAT) Family	betalactone	xantholipin	C:plasma membrane
2	PM_91	NADP-dependent oxidoreductase	PF00107 Zinc-binding dehydrogenase;PF16884 N-terminal domain of oxidoreductase							C:plasma membrane
2	PM_92	AMP-binding protein	PF13193 AMP-binding enzyme C-terminal domain;PF00501 AMP-binding enzyme				4.C.1 The Fatty Acid Group Translocation (FAT) Family			C:plasma membrane
2	PM_93	NAD(P)-dependent alcohol dehydrogenase	PF00107 Zinc-binding dehydrogenase;PF08240 Alcohol dehydrogenase GroES-like domain							C:plasma membrane
2	PM_94	AMP-binding protein	PF00501 AMP-binding enzyme							C:extracellular space
2	PM_95	aldehyde dehydrogenase	PF00171 Aldehyde dehydrogenase family							C:cytoplasm
2	PM_96	non-ribosomal peptide synthetase	PF00550 Phosphopantetheine attachment site;PF00668 Condensation domain;PF00975 Thioesterase domain;PF13193 AMP-binding enzyme C-terminal domain;PF00501 AMP-binding enzyme	GT2				NRPS	heterobactin A / heterobactin S2	C:plasma membrane
2	PM_97	acyl--CoA ligase	PF13193 AMP-binding enzyme C-terminal domain;PF00501 AMP-binding enzyme				4.C.1 The Fatty Acid Group Translocation (FAT) Family			C:plasma membrane
2	PM_98	MaoC family dehydratase	PF01575 MaoC like domain							C:cytoplasm
3	AC_118	ATP-dependent bile acid permease	PF00664 ABC transporter transmembrane region				3.A.1 The ATP-binding Cassette (ABC) Superfamily			C:plasma membrane
3	AC_119	ATP-dependent bile acid permease	PF00005 ABC transporter;PF00664 ABC transporter transmembrane region;PF07217 Heterokaryon incompatibility protein Het-C				3.A.1 The ATP-binding Cassette (ABC) Superfamily			C:plasma membrane
3	AC_120	metal resistance protein ycf1	PF00005 ABC transporter;PF00664 ABC transporter transmembrane region				3.A.1 The ATP-binding Cassette (ABC) Superfamily			C:plasma membrane
3	AC_121	ras GEF	PF00005 ABC transporter;PF07727 Reverse transcriptase (RNA-dependent DNA polymerase)		subfamily A11A unassigned peptidases (Takifugu rubripes)	A11	3.A.1 The ATP-binding Cassette (ABC) Superfamily			C:endomembrane system
3	AC_122	ATP-binding cassette transporter	PF00005 ABC transporter;PF00664 ABC transporter transmembrane region				3.A.1 The ATP-binding Cassette (ABC) Superfamily			C:plasma membrane
3	PM_99	ABC transporter ATP-binding protein	PF00005 ABC transporter;PF00664 ABC transporter transmembrane region				3.A.1 The ATP-binding Cassette (ABC) Superfamily			C:plasma membrane
3	PM_100	ABC transporter ATP-binding protein	PF00005 ABC transporter				3.A.1 The ATP-binding Cassette (ABC) Superfamily			C:cytoplasm
3	PM_101	ABC transporter	PF12399 Branched-chain amino acid ATP-binding cassette transporter;PF00005 ABC transporter;PF02653 Branched-chain amino acid transport system / permease component				3.A.1 The ATP-binding Cassette (ABC) Superfamily			C:plasma membrane
3	PM_102	ABC transporter ATP-binding protein	PF00005 ABC transporter				3.A.1 The ATP-binding Cassette (ABC) Superfamily			C:cytoplasm
3	PM_103	ABC transporter ATP-binding protein	PF00005 ABC transporter				3.A.1 The ATP-binding Cassette (ABC) Superfamily			C:cytoplasm
3	PM_104	Xenobiotic-transporting ATPase	PF00005 ABC transporter;PF00664 ABC transporter transmembrane region				3.A.1 The ATP-binding Cassette (ABC) Superfamily			C:plasma membrane
3	PM_105	Monosaccharide-transporting ATPase	PF00005 ABC transporter				3.A.1 The ATP-binding Cassette (ABC) Superfamily			C:cytoplasm
3	PM_106	ABC-type transporter, integral membrane subunit	PF00528 Binding-protein-dependent transport system inner membrane component				3.A.1 The ATP-binding Cassette (ABC) Superfamily			C:plasma membrane
3	PM_107	MULTISPECIES: ABC transporter ATP-binding protein	PF08352 Oligopeptide/dipeptide transporter;C-terminal region;PF00005 ABC transporter				3.A.1 The ATP-binding Cassette (ABC) Superfamily			C:cytoplasm
3	PM_108	ABC transporter ATP-binding protein	PF00005 ABC transporter				3.A.1 The ATP-binding Cassette (ABC) Superfamily			C:cytoplasm
3	PM_109	ABC transporter ATP-binding protein/permease	PF00005 ABC transporter;PF00664 ABC transporter transmembrane region				3.A.1 The ATP-binding Cassette (ABC) Superfamily			C:plasma membrane
3	PM_110	ABC transporter permease	PF00528 Binding-protein-dependent transport system inner membrane component				3.A.1 The ATP-binding Cassette (ABC) Superfamily			C:plasma membrane
3	PM_111	iron ABC transporter permease	PF00528 Binding-protein-dependent transport system inner membrane component				3.A.1 The ATP-binding Cassette (ABC) Superfamily			C:plasma membrane
3	PM_112	ABC transporter ATP-binding protein/permease	PF00005 ABC transporter;PF00664 ABC transporter transmembrane region				3.A.1 The ATP-binding Cassette (ABC) Superfamily			C:plasma membrane
3	PM_113	ATP-binding cassette domain-containing protein	PF00005 ABC transporter				3.A.1 The ATP-binding Cassette (ABC) Superfamily			C:cytoplasm
3	PM_114	thiol reductant ABC exporter subunit CydC	PF00005 ABC transporter				3.A.1 The ATP-binding Cassette (ABC) Superfamily			C:plasma membrane
3	PM_115	Multidrug ABC transporter permease	PF00005 ABC transporter;PF00664 ABC transporter transmembrane region				3.A.1 The ATP-binding Cassette (ABC) Superfamily			C:plasma membrane
3	PM_116	ABC transporter permease	PF00528 Binding-protein-dependent transport system inner membrane component				3.A.1 The ATP-binding Cassette (ABC) Superfamily			C:plasma membrane
3	PM_117	ABC transporter ATP-binding protein	PF00005 ABC transporter				3.A.1 The ATP-binding Cassette (ABC) Superfamily			C:cytoplasm
3	PM_118	ABC transporter ATP-binding protein	PF00005 ABC transporter				3.A.1 The ATP-binding Cassette (ABC) Superfamily			C:cytoplasm
3	PM_119	Tetronasin ABC transporter ATP-binding protein	PF00005 ABC transporter				3.A.1 The ATP-binding Cassette (ABC) Superfamily			C:cytoplasm
3	PM_120	ABC transporter ATP-binding protein	PF12399 Branched-chain amino acid ATP-binding cassette transporter;PF00005 ABC transporter				3.A.1 The ATP-binding Cassette (ABC) Superfamily			C:cytoplasm
3	PM_121	ABC transporter ATP-binding protein	PF00005 ABC transporter;PF12848 ABC transporter				3.A.1 The ATP-binding Cassette (ABC) Superfamily			C:cytoplasm
3	PM_122	Metal transporter	PF00528 Binding-protein-dependent transport system inner membrane component				3.A.1 The ATP-binding Cassette (ABC) Superfamily			C:plasma membrane
3	PM_123	ABC transporter ATP-binding protein	PF00005 ABC transporter				3.A.1 The ATP-binding Cassette (ABC) Superfamily			C:cytoplasm
3	PM_124	Iron ABC transporter ATP-binding protein	PF00005 ABC transporter				3.A.1 The ATP-binding Cassette (ABC) Superfamily			C:cytoplasm
3	PM_125	Polar amino acid ABC transporter, inner membrane subunit	PF00528 Binding-protein-dependent transport system inner membrane component				3.A.1 The ATP-binding Cassette (ABC) Superfamily			C:plasma membrane
3	PM_126	ABC transporter related protein	PF00005 ABC transporter				3.A.1 The ATP-binding Cassette (ABC) Superfamily			C:cytoplasm
3	PM_127	ABC transporter related protein	PF00005 ABC transporter				3.A.1 The ATP-binding Cassette (ABC) Superfamily			C:cytoplasm
3	PM_128	Sulfate-transporting ATPase	PF00005 ABC transporter				3.A.1 The ATP-binding Cassette (ABC) Superfamily			C:cytoplasm
3	PM_129	Monosaccharide-transporting ATPase	PF12399 Branched-chain amino acid ATP-binding cassette transporter;PF00005 ABC transporter				3.A.1 The ATP-binding Cassette (ABC) Superfamily			C:cytoplasm
3	PM_130	ATP-binding cassette domain-containing protein	PF00005 ABC transporter				3.A.1 The ATP-binding Cassette (ABC) Superfamily			C:cytoplasm
3	PM_131	amino acid ABC transporter ATP-binding protein	PF00005 ABC transporter				3.A.1 The ATP-binding Cassette (ABC) Superfamily			C:cytoplasm
3	PM_132	ABC transporter ATP-binding protein/permease	PF00005 ABC transporter;PF00664 ABC transporter transmembrane region				3.A.1 The ATP-binding Cassette (ABC) Superfamily			C:plasma membrane
3	PM_133	MULTISPECIES: ABC transporter permease	PF01061 ABC-2 type transporter				3.A.1 The ATP-binding Cassette (ABC) Superfamily			C:plasma membrane
3	PM_134	ABC transporter ATP-binding protein	PF08352 Oligopeptide/dipeptide transporter;C-terminal region;PF00005 ABC transporter				3.A.1 The ATP-binding Cassette (ABC) Superfamily			C:cytoplasm
3	PM_135	ABC transporter ATP-binding protein	PF08352 Oligopeptide/dipeptide transporter;C-terminal region;PF00005 ABC transporter				3.A.1 The ATP-binding Cassette (ABC) Superfamily			C:cytoplasm
3	PM_136	ABC transporter ATP-binding protein	PF00005 ABC transporter				3.A.1 The ATP-binding Cassette (ABC) Superfamily			C:cytoplasm
3	PM_137	ATP-binding cassette domain-containing protein	PF00005 ABC transporter							C:cytoplasm
3	PM_138	ABC transporter ATP-binding protein	PF08352 Oligopeptide/dipeptide transporter;C-terminal region;PF00005 ABC transporter				3.A.1 The ATP-binding Cassette (ABC) Superfamily			C:cytoplasm
3	PM_139	ABC transporter ATP-binding protein	PF00005 ABC transporter				3.A.1 The ATP-binding Cassette (ABC) Superfamily			C:cytoplasm
4	AC_123	dihydrolipoyl dehydrogenase	PF07992 Pyridine nucleotide-disulphide oxidoreductase;PF02852 Pyridine nucleotide-disulphide oxidoreductase;dimerisation domain							C:mitochondrion
4	AC_124	pyruvate carboxylase	PF00289 Biotin carboxylase;N-terminal domain;PF00364 Biotin-requiring enzyme;PF02786 Carbamoyl-phosphate synthase L chain;ATP binding domain;PF02436 Conserved carboxylase domain;PF02785 Biotin carboxylase C-terminal domain;PF00682 HMGL-like				3.B.1 The Na+-transporting Carboxylic Acid Decarboxylase (NaT-DC) Family			C:mitochondrion
4	AC_125	hypothetical protein AURDEDRAFT_153044	PF00289 Biotin carboxylase;N-terminal domain;PF02626 Carboxyltransferase domain;subdomain A and B;PF00364 Biotin-requiring enzyme;PF02682 Carboxyltransferase domain;subdomain C and D;PF02786 Carbamoyl-phosphate synthase L chain;ATP binding domain;PF02785 Biotin carboxylase C-terminal domain							C:mitochondrion
4	AC_126	NADH dehydrogenase	PF07992 Pyridine nucleotide-disulphide oxidoreductase							C:mitochondrion
4	AC_127	hypothetical protein AURDEDRAFT_115328	PF01979 Amidohydrolase family		family M38 non-peptidase homologues (Batrachochytrium dendrobatidis)	M38				C:endomembrane system
4	PM_140	Fused acetyl/propionyl-CoA carboxylase subuit alpha/methylmalonyl-CoA decarboxylase subunit alpha	PF00289 Biotin carboxylase;N-terminal domain;PF00364 Biotin-requiring enzyme;PF02786 Carbamoyl-phosphate synthase L chain;ATP binding domain;PF02785 Biotin carboxylase C-terminal domain;PF01039 Carboxyl transferase domain;PF08326 Acetyl-CoA carboxylase;central region							C:cytoplasm
4	PM_141	Acetyl-CoA carboxylase	PF01039 Carboxyl transferase domain							C:cytoplasm
4	PM_142	dihydroorotase	PF01979 Amidohydrolase family		family M38 non-peptidase homologues (Pseudonocardia dioxanivorans)	M38				C:cytoplasm
4	PM_143	alpha-ketoacid dehydrogenase subunit beta	PF02779 Transketolase;pyrimidine binding domain;PF02780 Transketolase;C-terminal domain							C:cytoplasm
4	PM_144	MULTISPECIES: aminodeoxychorismate/anthranilate synthase component II	PF00117 Glutamine amidotransferase class-I		TRP3 protein (Amycolatopsis sp. ATCC 39116)	C26				C:cytoplasm
4	PM_145	biotin/lipoyl-binding protein	PF00289 Biotin carboxylase;N-terminal domain;PF00364 Biotin-requiring enzyme;PF02786 Carbamoyl-phosphate synthase L chain;ATP binding domain;PF02785 Biotin carboxylase C-terminal domain							C:cytoplasm
4	PM_146	glutamate synthase subunit beta	PF07992 Pyridine nucleotide-disulphide oxidoreductase;PF14691 Dihydroprymidine dehydrogenase domain II;4Fe-4S cluster							C:plasma membrane
4	PM_147	MULTISPECIES: Si-specific NAD(P)(+) transhydrogenase	PF07992 Pyridine nucleotide-disulphide oxidoreductase;PF02852 Pyridine nucleotide-disulphide oxidoreductase;dimerisation domain							C:plasma membrane
4	PM_148	hydroxymethylglutaryl-CoA lyase	PF00682 HMGL-like							C:cytoplasm
4	PM_149	biotin-dependent carboxyltransferase family protein	PF02626 Carboxyltransferase domain;subdomain A and B							C:cytoplasm
4	PM_150	imidazolonepropionase	PF01979 Amidohydrolase family		family M38 non-peptidase homologues (Leucobacter komagatae)	M38				C:cytoplasm
4	PM_151	pyruvate carboxylase	PF00289 Biotin carboxylase;N-terminal domain;PF00364 Biotin-requiring enzyme;PF02786 Carbamoyl-phosphate synthase L chain;ATP binding domain;PF02436 Conserved carboxylase domain;PF02785 Biotin carboxylase C-terminal domain;PF00682 HMGL-like				3.B.1 The Na+-transporting Carboxylic Acid Decarboxylase (NaT-DC) Family			C:cytoplasm
4	PM_152	glutamate synthase large subunit	PF04898 Glutamate synthase central domain;PF00310 Glutamine amidotransferases class-II;PF01493 GXGXG motif;PF01645 Conserved region in glutamate synthase		glutamate synthase (NADPH) large chain (Pseudonocardia dioxanivorans)	C44				C:cytoplasm
4	PM_153	ATP-grasp domain-containing protein	PF00289 Biotin carboxylase;N-terminal domain;PF00364 Biotin-requiring enzyme;PF02786 Carbamoyl-phosphate synthase L chain;ATP binding domain;PF02785 Biotin carboxylase C-terminal domain							C:cytoplasm
4	PM_154	hypothetical protein	PF02852 Pyridine nucleotide-disulphide oxidoreductase;dimerisation domain							C:cytoplasm
4	PM_155	Carbamoyl-phosphate synthase large chain	PF02142 MGS-like domain;PF02787 Carbamoyl-phosphate synthetase large chain;oligomerisation domain;PF02786 Carbamoyl-phosphate synthase L chain;ATP binding domain							C:cytoplasm
4	PM_156	Acetyl/propionyl-CoA carboxylase subuit alpha	PF00289 Biotin carboxylase;N-terminal domain;PF00364 Biotin-requiring enzyme;PF02786 Carbamoyl-phosphate synthase L chain;ATP binding domain;PF02785 Biotin carboxylase C-terminal domain							C:cytoplasm
4	PM_157	Oxidoreductase	PF07992 Pyridine nucleotide-disulphide oxidoreductase;PF00724 NADH:flavin oxidoreductase / NADH oxidase family							C:cytoplasm
4	PM_158	Dihydrolipoyl dehydrogenase	PF07992 Pyridine nucleotide-disulphide oxidoreductase;PF02852 Pyridine nucleotide-disulphide oxidoreductase;dimerisation domain							C:cytoplasm
4	PM_159	Amidohydrolase	PF01979 Amidohydrolase family		family M38 non-peptidase homologues (Nakamurella multipartita)	M38				C:cytoplasm
4	PM_160	Aspartate carbamoyltransferase	PF02729 Aspartate/ornithine carbamoyltransferase;carbamoyl-P binding domain;PF00185 Aspartate/ornithine carbamoyltransferase;Asp/Orn binding domain							C:cytoplasm
4	PM_161	NADH oxidase	PF07992 Pyridine nucleotide-disulphide oxidoreductase;PF00724 NADH:flavin oxidoreductase / NADH oxidase family							C:cytoplasm
4	PM_162	NADH dehydrogenase (Ubiquinone)	PF07992 Pyridine nucleotide-disulphide oxidoreductase							C:cytoplasm
4	PM_163	Acetyl-CoA carboxylase	PF00289 Biotin carboxylase;N-terminal domain;PF00364 Biotin-requiring enzyme;PF02786 Carbamoyl-phosphate synthase L chain;ATP binding domain;PF02785 Biotin carboxylase C-terminal domain;PF01039 Carboxyl transferase domain							C:extracellular space
4	PM_164	2,4-dienoyl-CoA reductase (NADPH)	PF07992 Pyridine nucleotide-disulphide oxidoreductase;PF00724 NADH:flavin oxidoreductase / NADH oxidase family;PF12831 FAD dependent oxidoreductase							C:cytoplasm
4	PM_165	NAD(P)/FAD-dependent oxidoreductase	PF07992 Pyridine nucleotide-disulphide oxidoreductase;PF02852 Pyridine nucleotide-disulphide oxidoreductase;dimerisation domain							C:plasma membrane
4	PM_166	allantoinase AllB	PF01979 Amidohydrolase family		family M38 non-peptidase homologues (Streptosporangium roseum)	M38				C:cytoplasm
4	PM_167	glutamate synthase-related protein	PF00355 Rieske 2Fe-2S domain;PF01645 Conserved region in glutamate synthase							C:cytoplasm
4	PM_168	acetyl-CoA carboxylase carboxyltransferase subunit alpha/beta	PF01039 Carboxyl transferase domain							C:cytoplasm
5	AC_128	cytochrome P450	PF00067 Cytochrome P450							C:endomembrane system
5	AC_129	cytochrome P450	PF00067 Cytochrome P450							C:organelle membrane
5	AC_130	cytochrome P450	PF00067 Cytochrome P450							C:endomembrane system
5	AC_131	cytochrome P450	PF00067 Cytochrome P450							C:endomembrane system
5	AC_132	cytochrome P450	PF00067 Cytochrome P450							C:endomembrane system
5	AC_133	cytochrome P450	PF00067 Cytochrome P450							C:plasma membrane
5	AC_134	hypothetical protein AURDEDRAFT_156518	PF00487 Fatty acid desaturase;PF00173 Cytochrome b5-like Heme/Steroid binding domain							C:organelle membrane
5	AC_135	cytochrome P450	PF00067 Cytochrome P450							C:plasma membrane
5	AC_136	cytochrome P450	PF00067 Cytochrome P450				2.A.57 The Equilibrative Nucleoside Transporter (ENT) Family			C:endomembrane system
5	AC_137	sulphite reductase hemo protein, beta subunit	PF00258 Flavodoxin;PF00067 Cytochrome P450;PF01077 Nitrite and sulphite reductase 4Fe-4S domain;PF03460 Nitrite/Sulfite reductase ferredoxin-like half domain					terpene		C:plasma membrane
5	AC_138	cytochrome P450	PF00067 Cytochrome P450;PF10230 Lipid-droplet associated hydrolase							C:organelle membrane
5	PM_169	MBL fold metallo-hydrolase	PF00753 Metallo-beta-lactamase superfamily							C:cytoplasm
5	PM_170	Reductase component of multicomponent terahydrofuran monooxygenase	PF00970 Oxidoreductase FAD-binding domain;PF00111 2Fe-2S iron-sulfur cluster binding domain;PF00175 Oxidoreductase NAD-binding domain				5.B.1 The Phagocyte (gp91phox) NADPH Oxidase Family			C:cytoplasm
5	PM_171	cytochrome P450	PF00067 Cytochrome P450							C:plasma membrane
5	PM_172	cytochrome P450	PF00067 Cytochrome P450							C:plasma membrane
5	PM_173	cytochrome P450	PF00067 Cytochrome P450							C:plasma membrane
5	PM_174	cytochrome P450	PF00067 Cytochrome P450							C:cytoplasm
5	PM_175	cytochrome P450	PF00067 Cytochrome P450							C:plasma membrane
5	PM_176	cytochrome P450	PF00067 Cytochrome P450							C:plasma membrane
5	PM_177	cytochrome P450	PF00067 Cytochrome P450							C:plasma membrane
5	PM_178	Cytochrome P450	PF00067 Cytochrome P450							C:plasma membrane
5	PM_179	Putative cytochrome P450	PF00067 Cytochrome P450							C:plasma membrane
5	PM_180	Cytochrome P450	PF00067 Cytochrome P450							C:cytoplasm
5	PM_181	Cytochrome P450	PF00067 Cytochrome P450							C:cytoplasm
5	PM_182	Cytochrome P450	PF00067 Cytochrome P450							C:plasma membrane
5	PM_183	cytochrome P450	PF00067 Cytochrome P450							C:plasma membrane
6	AC_139	sugar transporter	PF00083 Sugar (and other) transporter				2.A.1 The Major Facilitator Superfamily (MFS)			C:plasma membrane
6	AC_140	MFS general substrate transporter	PF07690 Major Facilitator Superfamily				2.A.1 The Major Facilitator Superfamily (MFS)			C:plasma membrane
6	AC_141	tRNA pseudouridine synthase D	PF07690 Major Facilitator Superfamily;PF01142 tRNA pseudouridine synthase D (TruD)				2.A.1 The Major Facilitator Superfamily (MFS)			C:plasma membrane
6	AC_142	MFS general substrate transporter, partial	PF01753 MYND finger;PF07690 Major Facilitator Superfamily				2.A.1 The Major Facilitator Superfamily (MFS)			C:plasma membrane
6	AC_143	amino acid permease	PF13520 Amino acid permease				2.A.3 The Amino Acid-Polyamine-Organocation (APC) Family			C:plasma membrane
6	AC_144	amino acid transporter	PF07690 Major Facilitator Superfamily;PF13520 Amino acid permease				2.A.1 The Major Facilitator Superfamily (MFS)			C:plasma membrane
6	PM_184	MFS transporter	PF07690 Major Facilitator Superfamily		family M20 unassigned peptidases (Campylobacter jejuni)	M20	2.A.1 The Major Facilitator Superfamily (MFS)			C:plasma membrane
6	PM_185	Conserved hypothetical transport protein	PF13520 Amino acid permease				2.A.3 The Amino Acid-Polyamine-Organocation (APC) Family			C:plasma membrane
6	PM_186	Major facilitator superfamily MFS_1	PF07690 Major Facilitator Superfamily;PF00083 Sugar (and other) transporter				2.A.1 The Major Facilitator Superfamily (MFS)			C:plasma membrane
6	PM_187	Major facilitator superfamily MFS_1	PF07690 Major Facilitator Superfamily				2.A.1 The Major Facilitator Superfamily (MFS)			C:plasma membrane
6	PM_188	MFS transporter	PF07690 Major Facilitator Superfamily				2.A.1 The Major Facilitator Superfamily (MFS)			C:plasma membrane
6	PM_189	MFS transporter	PF07690 Major Facilitator Superfamily							C:plasma membrane
6	PM_190	MFS transporter	PF07690 Major Facilitator Superfamily				2.A.1 The Major Facilitator Superfamily (MFS)			C:plasma membrane
6	PM_191	MHS family MFS transporter	PF07690 Major Facilitator Superfamily;PF00083 Sugar (and other) transporter		family M20 unassigned peptidases (Campylobacter jejuni)	M20	2.A.1 The Major Facilitator Superfamily (MFS)			C:plasma membrane
6	PM_192	MFS transporter	PF07690 Major Facilitator Superfamily				2.A.1 The Major Facilitator Superfamily (MFS)			C:plasma membrane
6	PM_193	MHS family MFS transporter	PF07690 Major Facilitator Superfamily;PF00083 Sugar (and other) transporter		family M20 unassigned peptidases (Campylobacter jejuni)	M20	2.A.1 The Major Facilitator Superfamily (MFS)			C:plasma membrane
7	AC_145	phospholipid-translocating P-type ATPase	PF16212 Phospholipid-translocating P-type ATPase C-terminal;PF13246 Cation transport ATPase (P-type);PF00248 Aldo/keto reductase family;PF16209 Phospholipid-translocating ATPase N-terminal				3.A.3 The P-type ATPase (P-ATPase) Superfamily			C:plasma membrane
7	AC_146	hypothetical protein AURDEDRAFT_188101	PF00293 NUDIX domain							C:mitochondrion
7	AC_147	hypothetical protein AURDEDRAFT_172047	PF00248 Aldo/keto reductase family;PF00293 NUDIX domain							C:cytoplasm
7	AC_148	voltage-gated potassium channel subunit beta-2	PF00248 Aldo/keto reductase family				8.A.5 The Voltage-gated K+ Channel ?-subunit (Kv?) Family			C:cytoplasm
7	AC_149	Aldo/keto reductase	PF00248 Aldo/keto reductase family				8.A.5 The Voltage-gated K+ Channel ?-subunit (Kv?) Family			C:cytoplasm
7	AC_150	Aldo/keto reductase	PF00248 Aldo/keto reductase family							C:mitochondrion
7	PM_194	Putative mutator protein MutT3	PF00293 NUDIX domain							C:cytoplasm
7	PM_195	NUDIX hydrolase	PF00293 NUDIX domain							C:cytoplasm
7	PM_196	NUDIX hydrolase	PF00293 NUDIX domain							C:cytoplasm
7	PM_197	Nudix hydrolase domain-containing protein	PF00293 NUDIX domain							C:cytoplasm
7	PM_198	2,5-didehydrogluconate reductase	PF00248 Aldo/keto reductase family				8.A.5 The Voltage-gated K+ Channel ?-subunit (Kv?) Family			C:cytoplasm
8	AC_151	RdRP-domain-containing protein	PF05183 RNA dependent RNA polymerase;PF02770 Acyl-CoA dehydrogenase;middle domain;PF02771 Acyl-CoA dehydrogenase;N-terminal domain;PF10250 GDP-fucose protein O-fucosyltransferase;PF00441 Acyl-CoA dehydrogenase;C-terminal domain							C:plasma membrane
8	PM_199	acyl-CoA dehydrogenase family protein	PF02770 Acyl-CoA dehydrogenase;middle domain;PF02771 Acyl-CoA dehydrogenase;N-terminal domain;PF00441 Acyl-CoA dehydrogenase;C-terminal domain							C:cytoplasm
8	PM_200	acyl-CoA/acyl-ACP dehydrogenase	PF02770 Acyl-CoA dehydrogenase;middle domain;PF02771 Acyl-CoA dehydrogenase;N-terminal domain;PF00441 Acyl-CoA dehydrogenase;C-terminal domain							C:cytoplasm
8	PM_201	acyl-CoA dehydrogenase family protein	PF02770 Acyl-CoA dehydrogenase;middle domain;PF02771 Acyl-CoA dehydrogenase;N-terminal domain;PF00441 Acyl-CoA dehydrogenase;C-terminal domain							C:cytoplasm
8	PM_202	acyl-CoA dehydrogenase family protein	PF02770 Acyl-CoA dehydrogenase;middle domain;PF02771 Acyl-CoA dehydrogenase;N-terminal domain;PF00441 Acyl-CoA dehydrogenase;C-terminal domain							C:plasma membrane
8	PM_203	Acyl-CoA dehydrogenase	PF02770 Acyl-CoA dehydrogenase;middle domain;PF02771 Acyl-CoA dehydrogenase;N-terminal domain;PF00441 Acyl-CoA dehydrogenase;C-terminal domain							C:cytoplasm
8	PM_204	Acyl-CoA dehydrogenase domain-containing protein	PF18158 Adaptive response protein AidB N-terminal domain;PF02770 Acyl-CoA dehydrogenase;middle domain;PF00441 Acyl-CoA dehydrogenase;C-terminal domain							C:plasma membrane
8	PM_205	acyl-CoA dehydrogenase family protein	PF02770 Acyl-CoA dehydrogenase;middle domain;PF02771 Acyl-CoA dehydrogenase;N-terminal domain;PF00441 Acyl-CoA dehydrogenase;C-terminal domain							C:cytoplasm
8	PM_206	acyl-CoA dehydrogenase family protein	PF08028 Acyl-CoA dehydrogenase;C-terminal domain;PF02771 Acyl-CoA dehydrogenase;N-terminal domain							C:cytoplasm
9	AC_152	tryptophan synthase beta subunit-like PLP-dependent enzyme	PF00291 Pyridoxal-phosphate dependent enzyme;PF14821 Threonine synthase N terminus							C:endomembrane system
9	PM_207	Tryptophan synthase beta chain	PF00291 Pyridoxal-phosphate dependent enzyme							C:cytoplasm
9	PM_208	CBS domain containing protein	PF04972 BON domain;PF00582 Universal stress protein family;PF00571 CBS domain							C:cytoplasm
9	PM_209	Putative signal transduction protein with CBS domains	PF00571 CBS domain		subfamily M50B non-peptidase homologues (Thermus scotoductus)	M50				C:cytoplasm
9	PM_210	hemolysin family protein	PF01595 Cyclin M transmembrane N-terminal domain;PF00571 CBS domain;PF03471 Transporter associated domain				1.A.112 The Cyclin M Mg2+ Exporter (CNNM) Family			C:plasma membrane
9	PM_211	CBS domain-containing protein	PF00571 CBS domain		subfamily M50B non-peptidase homologues (Oceanithermus profundus)	M50				C:cytoplasm
9	PM_212	Serine/threonine dehydratase	PF00291 Pyridoxal-phosphate dependent enzyme							C:cytoplasm
9	PM_213	Uncharacterized protein	PF00571 CBS domain							C:cytoplasm
10	AC_153	hypothetical protein AURDEDRAFT_182821	PF00350 Dynamin family;PF06071 Protein of unknown function (DUF933);PF01926 50S ribosome-binding GTPase							C:endomembrane system
10	AC_154	BAR-domain-containing protein	PF03114 BAR domain				8.A.34 The Endophilin (Endophilin) Family			C:cytoplasm
10	PM_214	Dynamin_N domain-containing protein	PF00350 Dynamin family				9.B.282 The Isoniazid-resistance (IniABC) Family			C:cytoplasm
10	PM_215	Dynamin_N domain-containing protein	PF00350 Dynamin family							C:plasma membrane
10	PM_216	GTPase Era	PF07650 KH domain;PF01926 50S ribosome-binding GTPase							C:cytoplasm
10	PM_217	Dynamin_N domain-containing protein	PF00350 Dynamin family							C:plasma membrane
10	PM_218	GTPase HflX	PF16360 GTP-binding GTPase Middle Region;PF01926 50S ribosome-binding GTPase;PF13167 GTP-binding GTPase N-terminal							C:cytoplasm
11	AC_155	subtilisin-like protein	PF07714 Protein tyrosine kinase;PF00082 Subtilase family		PoSl ({Pleurotus ostreatus})-type peptidase (Phanerochaete chrysosporium)	S08				C:extracellular space
11	AC_156	subtilisin-like protease	PF06280 Fn3-like domain;PF00082 Subtilase family		PoSl ({Pleurotus ostreatus})-type peptidase (Phanerochaete chrysosporium)	S08				C:extracellular space
11	AC_157	subtilisin-like protein	PF06280 Fn3-like domain;PF00082 Subtilase family		PoSl ({Pleurotus ostreatus})-type peptidase (Laccaria bicolor)	S08				C:plasma membrane
11	AC_158	subtilisin-like protease	PF00082 Subtilase family		PoSl ({Pleurotus ostreatus})-type peptidase (Phanerochaete chrysosporium)	S08	1.I.3 The Bacterial (Planctomycetes) Nuclear Pore-like Complex (B-NPC) Family			C:plasma membrane
11	AC_159	peptidase 1	PF00082 Subtilase family;PF05922 Peptidase inhibitor I9		subfamily S8A unassigned peptidases (Auricularia delicata)	S08				C:extracellular space
11	AC_160	subtilisin-like protein	PF06280 Fn3-like domain;PF00082 Subtilase family		PoSl ({Pleurotus ostreatus})-type peptidase (Phanerochaete chrysosporium)	S08				C:extracellular space
11	PM_219	S8 family peptidase	PF00082 Subtilase family		subfamily S8A unassigned peptidases (Pseudonocardia dioxanivorans)	S08				C:cytoplasm
12	AC_161	CAIB/BAIF family enzyme	PF02515 CoA-transferase family III				9.B.191 The Endoplasmic Reticulum Retention Receptor (KDELR) Family			C:mitochondrion
12	PM_220	CoA transferase	PF02515 CoA-transferase family III							C:cytoplasm
12	PM_221	CoA transferase	PF02515 CoA-transferase family III				1.W.6 The (Bacillus Phage phi29) Portal Protein 6 (PPP6) Family	betalactone	iturin	C:cytoplasm
12	PM_222	Formyl-CoA transferase	PF02515 CoA-transferase family III							C:plasma membrane
12	PM_223	Alpha-methylacyl-CoA racemase	PF02515 CoA-transferase family III				9.B.191 The Endoplasmic Reticulum Retention Receptor (KDELR) Family			C:plasma membrane
12	PM_224	Formyl-CoA transferase	PF02515 CoA-transferase family III				1.W.6 The (Bacillus Phage phi29) Portal Protein 6 (PPP6) Family			C:cytoplasm
12	PM_225	L-carnitine dehydratase/bile acid-inducible protein F	PF02515 CoA-transferase family III							C:plasma membrane
13	AC_162	NAD(P)-binding protein	PF08501 Shikimate dehydrogenase substrate binding domain							C:organelle membrane
13	AC_163	Pentafunctional AroM protein	PF01488 Shikimate / quinate 5-dehydrogenase;PF01487 Type I 3-dehydroquinase;PF01761 3-dehydroquinate synthase;PF18317 Shikimate 5'-dehydrogenase C-terminal domain;PF01202 Shikimate kinase;PF00275 EPSP synthase (3-phosphoshikimate 1-carboxyvinyltransferase);PF08501 Shikimate dehydrogenase substrate binding domain							C:mitochondrion
13	PM_226	3-phosphoshikimate 1-carboxyvinyltransferase	PF00275 EPSP synthase (3-phosphoshikimate 1-carboxyvinyltransferase)							C:cytoplasm
13	PM_227	DHQ_synthase domain-containing protein	PF01761 3-dehydroquinate synthase							C:cytoplasm
13	PM_228	3-dehydroquinate synthase	PF01761 3-dehydroquinate synthase					NRPS-like	microansamycin	C:cytoplasm
13	PM_229	shikimate dehydrogenase	PF18317 Shikimate 5'-dehydrogenase C-terminal domain;PF08501 Shikimate dehydrogenase substrate binding domain							C:cytoplasm
14	AC_164	terpenoid synthase	PF03936 Terpene synthase family;metal binding domain;PF01370 NAD dependent epimerase/dehydratase family					terpene		C:endomembrane system
14	AC_165	D-isomer specific 2-hydroxyacid dehydrogenase	PF00389 D-isomer specific 2-hydroxyacid dehydrogenase;catalytic domain;PF02826 D-isomer specific 2-hydroxyacid dehydrogenase;NAD binding domain;PF00481 Protein phosphatase 2C							C:cytoplasm
14	PM_230	homoserine dehydrogenase	PF03447 Homoserine dehydrogenase;NAD binding domain;PF00742 Homoserine dehydrogenase;PF01842 ACT domain							C:cytoplasm
14	PM_231	UDP-glucose 4-epimerase	PF01370 NAD dependent epimerase/dehydratase family							C:cytoplasm
14	PM_232	formyltetrahydrofolate deformylase	PF00551 Formyl transferase;PF01842 ACT domain							C:cytoplasm
15	AC_166	ribonuclease H-like protein	PF00929 Exonuclease							C:mitochondrion
15	PM_233	DNA polymerase III subunit epsilon	PF01541 GIY-YIG catalytic domain;PF00929 Exonuclease							C:cytoplasm
15	PM_234	DNA polymerase III subunit epsilon	PF01541 GIY-YIG catalytic domain;PF00929 Exonuclease							C:cytoplasm
15	PM_235	PHP domain-containing protein	PF02811 PHP domain;PF14716 Helix-hairpin-helix domain							C:cytoplasm
15	PM_236	DNA polymerase III subunit alpha	PF17657 Bacterial DNA polymerase III alpha subunit finger domain;PF02811 PHP domain;PF14579 Helix-hairpin-helix motif;PF07733 Bacterial DNA polymerase III alpha NTPase domain	GH13						C:plasma membrane
